# Supplementary material for: DE-T1 On The Blastocyst Obtained Rate and Live Births Rates in Women Receiving IVF-ET Treatment
Source: Research Square preprint supplement (doi:10.21203/rs.3.rs-900217/v1), 2021-10-01
Supplement: Supplementary file 1 [file 92423c2f70dc424c9b032e8a.xls]

## Sheet:  Supplementary Tables 2
DE-T1 supplementation（1=yes, 0=no）	Age	AMH	Total number of bastocyst obtained	Csess who got bastocyst (1=yes,0=no)
1	38	3.6	5	1
1	35	7.6	18	1
0	35	4.9	4	1
1	39	1.2	1	1
1	39	0.7	4	1
1	35	9.5	2	1
1	31	2.9	9	1
1	41	1.8	7	1
1	37	6.7	9	1
0	35	4.9	4	1
0	36	5.2	9	1
0	32	3.4	4	1
0	38	2.1	3	1
1	36	0.6	4	1
1	33	2.3	4	1
1	36	4.3	3	1
1	39	2.8	3	1
1	32	3.8	3	1
0	33	1	1	1
1	35	6.6	4	1
1	36	3.2	6	1
1	40	0.4	3	1
0	30	5.1	10	1
0	38	1.7	3	1
1	44	2	2	1
1	30	5.3	2	1
1	37	5.8	10	1
1	39	5.7	3	1
0	42	2.7	5	1
0	37	3.9	5	1
1	40	0.4	1	1
1	35	3.4	14	1
1	35	0.4	1	1
1	38	0.8	6	1
1	34	2.7	12	1
1	36	0.2	1	1
1	41	2	4	1
0	35	2.6	16	1
0	37	4.5	16	1
1	39	2.9	17	1
1	41	0.7	6	1
0	34	3.7	5	1
1	39	1.8	2	1
1	38	3	3	1
1	44	0.1	1	1
1	33	3.6	9	1
0	41	2.7	5	1
1	37	0.4	8	1
0	33	5.8	6	1
1	31	1.7	8	1
1	39	0.4	2	1
1	38	2.6	5	1
1	39	6.4	13	1
1	32	2.9	9	1
1	36	1.1	4	1
0	35	1.1	2	1
0	42	2.4	7	1
0	40	2.5	4	1
1	37	2.8	7	1
1	36	0.5	2	1
1	35	0.5	4	1
1	42	1.5	7	1
1	33	4.6	7	1
1	37	4.3	1	1
1	40	2.1	4	1
1	41	3.2	3	1
1	42	3.3	4	1
1	33	12.5	8	1
1	43	1.7	7	1
1	32	8.2	7	1
0	34	5.8	5	1
1	39	0.8	4	1
1	31	6	18	1
1	33	0.4	2	1
1	40	3.2	6	1
1	30	4.9	2	1
1	44	0.9	5	1
1	36	4.9	6	1
0	35	0.1	1	1
1	41	2.3	2	1
1	42	1.6	2	1
1	31	2.4	5	1
1	43	1.3	0	0
1	44	1.9	5	1
1	31	3.1	11	1
0	35	1.3	1	1
1	38	4.6	9	1
1	35	4.4	1	1
0	35	6.2	12	1
1	30	0.5	14	1
1	42	1.2	3	1
0	33	9.7	12	1
1	32	5.3	4	1
0	34	6.4	3	1
1	44	0.9	7	1
1	31	2.8	7	1
0	35	0.7	1	1
0	35	0.4	4	1
1	35	2.7	3	1
0	36	1.1	2	1
0	42	2.1	7	1
0	36	7.5	6	1
1	46	0.3	3	1
1	31	1.1	5	1
1	36	1.1	3	1
1	33	7.9	8	1
1	46	0.2	4	1
0	31	7	13	1
1	34	1.5	1	1
1	36	1.8	5	1
0	35	4.4	4	1
1	39	1.7	2	1
1	40	2.2	9	1
1	38	2.2	6	1
1	35	2.4	3	1
1	40	1.7	5	1
1	34	1.6	3	1
1	38	1.6	5	1
1	32	2.7	8	1
1	37	2.2	6	1
1	44	0.4	2	1
0	36	0.4	1	1
1	41	1.2	1	1
0	31	1.9	5	1
1	31	7.9	4	1
0	36	3.4	2	1
1	31	4.4	7	1
1	32	2.4	4	1
0	30	4.2	6	1
1	36	3.9	5	1
0	32	8.2	1	1
1	34	2.1	1	1
0	34	2.5	8	1
0	39	0.04	2	1
0	33	4.3	6	1
0	30	5.3	6	1
1	34	1.9	9	1
0	43	0.6	2	1
1	31	17.9	6	1
1	36	3.2	2	1
1	37	3.1	14	1
0	35	5.3	11	1
1	33	3.5	2	1
1	37	2.9	7	1
1	31	3	4	1
1	44	0.4	1	1
1	35	1.4	2	1
1	41	1.5	2	1
1	43	0.1	4	1
1	39	3.1	2	1
1	32	5.2	10	1
1	34	5.7	5	1
0	31	1.8	9	1
1	35	1.5	2	1
1	40	3.1	16	1
0	30	2.6	7	1
1	38	4.5	3	1
0	32	8.1	13	1
0	37	0.1	2	1
1	31	3.3	6	1
1	39	1.7	1	1
1	35	2.6	20	1
0	42	1.2	1	1
1	35	2.8	8	1
1	32	2.1	4	1
1	44	0.3	4	1
1	45	2	1	1
1	35	4.1	4	1
1	35	9.3	3	1
1	34	5.1	5	1
1	30	9.1	17	1
1	34	2.2	2	1
1	32	2.3	5	1
0	38	0.4	2	1
1	39	1.4	10	1
1	41	2	4	1
1	36	1	2	1
1	38	7.5	2	1
1	43	0.5	4	1
1	41	2	5	1
1	39	10.9	4	1
1	41	3.9	7	1
1	42	0.6	1	1
1	38	4.3	5	1
1	38	4.4	8	1
1	33	3.7	4	1
1	33	4.7	7	1
1	43	5.7	10	1
1	33	0.4	1	1
1	34	3.1	1	1
1	31	4	3	1
1	36	0.2	1	1
1	39	0.4	2	1
1	35	0.7	0	0
1	33	3.2	3	1
1	42	2.8	1	1
1	32	3.9	3	1
1	43	0.2	0	0
1	42	0.5	1	1
1	36	5.7	9	1
1	35	2.8	7	1
1	35	0.5	1	1
1	41	0.4	3	1
0	36	3.8	1	1
1	37	2.6	1	1
1	41	0.2	0	0
1	39	2.3	1	1
1	45	0.1	1	1
1	41	0.1	1	1
1	38	1.03	0	0
1	47	0.9	2	1
0	43	0.1	0	0
0	37	0.9	3	1
0	39	0.1	0	0
0	40	1.6	0	0
0	42	7.9	15	1
1	34	1.2	0	0
0	32	1	0	0
1	34	3.1	0	0
1	46	0.1	0	0
1	34	0.9	1	1
1	35	1.3	0	0
1	32	0.1	0	0
1	35	1.7	2	1
1	32	0.5	2	1
1	45	0.4	0	0
1	43	0.9	2	1
1	40	1.3	0	0
1	35	2	0	0
0	43	1.9	1	1
0	36	1.1	0	0
0	38	0.2	0	0
1	46	0.2	2	1
1	40	1.3	0	0
1	39	0.9	1	1
0	38	0.1	2	1
1	38	2.9	0	0
1	41	3.3	0	0
0	30	1.2	0	0
1	37	1.6	0	0
0	43	0.1	3	1
0	42	0.1	0	0
1	44	0.1	0	0
1	37	1.1	0	0
0	39	0.9	2	1
0	41	0.1	0	0
0	41	0.5	0	0
1	45	3.7	0	0
1	35	1.9	1	1
0	41	0.1	0	0
1	48	0.1	0	0
1	43	1.8	0	0
0	32	0.2	0	0
1	45	0.3	2	1
0	40	0.7	1	1
1	40	0.2	0	0
0	37	0.4	4	1
1	43	2.2	5	1
1	43	2.3	10	1
1	38	0.9	6	1
0	32	1.6	3	1
1	37	0.1	8	1
0	36	4.5	16	1
1	41	0.7	4	1
1	41	1.6	6	1
0	32	5.4	0	0
1	42	0.8	4	1
0	31	3.1	0	0
0	35	2.1	4	1
0	45	0.06	0	0
1	40	0.9	0	0
1	43	0.02	0	0
1	44	0.5	0	0
1	46	0.3	0	0
1	37	0.06	0	0
1	41	0.36	1	1
0	43	1.9	0	0
1	42	2.1	0	0
1	35	0.3	0	0
1	45	1.6	0	0
1	43	0.4	0	0
1	41	1	1	1
0	42	7.9	3	1
1	45	0.3	0	0
1	40	1.1	3	1
1	44	0.3	0	0
1	40	1.4	3	1
0	40	1.2	0	0
0	41	0.7	0	0
1	41	1.3	0	0
1	41	2	2	1
1	38	0.5	0	0
0	46	1.4	0	0
1	46	0.7	1	1
1	39	0.1	0	0
1	36	0.7	0	0
1	38	3.1	0	0
1	37	0.3	0	0
0	45	0.2	0	0
1	34	1.6	0	0
1	46	0.7	0	0
1	44	1.1	2	1
1	42	0.1	0	0
0	42	0.1	0	0
1	42	0.2	0	0
0	47	0.6	0	0
1	43	0.5	4	1
0	47	0.02	0	0
1	36	0.3	1	1
1	34	1	0	0
0	37	2.7	0	0
1	38	0.4	0	0
1	30	1	0	0
0	35	1.6	6	1
1	36	1.7	4	1
1	41	0.9	1	1
1	35	4	0	0
0	36	0.14	5	1
0	44	1	0	0
0	39	0.4	2	1
1	47	0.02	0	0
0	30	1.3	0	0
1	41	0.02	0	0
1	42	0.7	25	1
1	44	1.7	5	1
0	43	1.1	3	1
1	34	0.2	3	1
0	37	0.5	0	0
0	46	1	0	0
1	46	0.4	5	1
0	39	0.8	0	0
0	33	4	0	0
0	43	1.2	2	1
0	46	0.8	0	0
1	43	0.1	1	1
1	42	0.4	0	0
0	43	0.07	0	0
1	42	1.1	0	0
0	38	0.9	0	0
0	37	0.3	0	0
1	45	0.1	0	0
1	42	0.1	1	1
1	43	0.05	0	0
1	51	0.3	0	0
0	39	0.8	0	0
1	41	0.5	0	0
1	44	0.6	1	1
0	40	2.2	0	0
1	43	0.5	0	0
0	42	0.4	0	0
1	44	1.1	0	0
0	35	7.7	0	0
0	46	0.12	0	0
1	44	0.4	0	0
0	34	4.6	0	0
0	40	0.9	3	1
0	31	0.8	0	0
0	33	0.1	1	1
0	42	5.5	3	1
0	36	0.14	0	0
0	34	0.5	1	1
0	45	3.8	3	1
0	34	0.7	5	1
0	30	0.8	3	1
0	37	0.04	0	0
1	46	0.2	0	0
0	41	3.5	6	1
0	35	0.3	6	1
0	39	6.4	2	1
0	33	1.7	3	1
0	43	2.9	4	1
0	35	4	9	1
0	37	0.2	0	0
0	38	4.6	7	1
0	34	0.07	0	0
1	43	1.4	2	1
1	47	0.01	0	0
0	43	0.04	0	0
0	46	0.1	0	0
1	37	1.77	11	1
1	44	0.74	0	0
0	38	2.3	0	0
1	42	1.48	0	0
1	41	0.78	3	1
1	34	1.86	0	0
1	36	1.8	6	1
0	44	1.1	0	0
0	40	1.7	0	0
1	37	0.18	5	1
0	36	1.15	4	1
0	41	1.05	2	1
1	37	0.2	1	1
1	39	3.7	10	1
1	37	2.57	9	1
1	44	1.33	4	1
1	44	1.45	2	1
1	39	3.5	7	1
0	46	0.65	2	1
1	45	0.25	1	1
1	37	2.1	1	1
1	34	0.41	3	1
1	45	2	3	1
1	43	0.22	1	1
1	41	0.35	0	0
1	44	1.03	1	1
1	42	0.35	1	1
1	40	0.69	2	1
1	43	2.13	9	1
1	46	0.74	0	0
1	40	7.35	11	1
1	44	1.87	3	1
1	45	0.38	0	0
0	36	1.12	3	1
0	42	0.22	0	0
1	43	1.01	3	1
0	40	1.18	2	1
1	37	3.8	5	1
1	42	3.93	2	1
1	40	1.84	4	1
1	45	0.3	1	1
0	45	1.7	0	0
1	41	0.37	6	1
1	30	5.02	6	1
0	40	2.2	0	0
1	37	0.63	0	0
1	40	1.7	10	1
0	45	0.9	0	0
1	40	1.16	5	1
1	38	3.3	6	1
0	41	2.46	4	1
0	40	0.39	0	0
1	46	0.6	0	0
1	36	2.76	9	1
1	30	2.99	6	1
1	31	1.57	3	1
1	37	4.1	9	1
1	34	1.37	9	1
0	42	0.49	5	1
1	39	1.98	5	1
1	35	1.88	8	1
1	40	1.14	2	1
1	42	1.02	5	1
1	40	1.33	4	1
1	33	2.3	8	1
1	45	0.39	0	0
1	44	2.08	2	1
1	36	1.15	1	1
1	46	0.27	4	1
1	32	2.27	7	1
1	33	1.48	6	1
1	33	4.04	12	1
1	44	0.92	1	1
0	43	1.19	2	1
0	46	0.76	0	0
1	42	0.98	1	1
1	42	0.7	1	1
1	35	0.02	2	1
1	42	0.47	0	0
1	32	1.12	7	1
1	44	0.1	3	1
0	37	2.11	3	1
1	36	2.93	8	1
1	32	4.24	0	0
1	36	1.3	4	1
0	40	0.35	0	0
0	40	3	5	1
1	42	0.28	0	0
1	39	2.94	7	1
1	38	0.96	7	1
1	41	1.93	0	0
0	45	1.3	0	0
1	35	1.1	1	1
1	35	1.46	9	1
1	40	2.83	6	1
1	33	1.66	7	1
1	41	3.61	11	1
1	31	8.56	11	1
1	33	2.27	8	1
1	49	0.09	0	0
0	46	2.99	0	0
1	45	0.06	0	0
1	45	0.98	1	1
0	30	5.6	8	1
1	39	4.47	0	0
1	45	0.42	0	0
1	42	1.75	7	1
1	36	3.47	5	1
1	48	0.62	4	1
1	38	0.61	1	1
1	46	0.23	1	1
0	47	0.77	0	0
0	46	0.03	0	0
0	49	0.08	0	0
1	44	2.43	1	1
1	41	1.84	4	1
1	38	0.1	2	1
1	30	3.09	9	1
1	36	2.55	11	1
1	44	1.01	0	0
1	41	1.23	1	1
1	32	6.41	3	1
1	36	2.64	9	1
1	42	0.01	0	0
1	35	4.35	3	1
0	44	0.26	0	0
1	40	1.06	0	0
1	39	1.65	1	1
1	42	2.76	5	1
1	30	8.08	15	1
0	39	1.13	2	1
1	40	0.4	0	0
1	41	1.13	4	1
1	36	2.62	3	1
0	36	1.35	0	0
1	39	0.18	0	0
0	36	2.18	4	1
1	40	2.18	3	1
1	39	0.98	6	1
0	41	0.91	1	1
1	40	1.28	1	1
1	38	0.79	6	1
0	45	0.12	0	0
0	49	0.04	0	0
1	42	0.34	0	0
1	34	4.74	19	1
1	40	3.66	13	1
0	37	1.41	8	1
1	43	0.36	1	1
1	36	1.47	4	1
1	36	15.79	6	1
1	39	4.09	11	1
1	35	2.2	11	1
1	35	3.97	1	1
0	45	2.64	0	0
0	36	3.61	6	1
1	39	1.54	4	1
0	34	0.03	0	0
1	47	0.12	0	0
1	39	1.05	1	1
1	38	1.61	3	1
1	32	0.69	4	1
1	31	3.68	3	1
1	37	2.5	5	1
1	35	1.42	6	1
0	41	3.37	3	1
1	43	1.98	7	1
1	40	0.45	1	1
0	39	0.07	0	0
0	38	1.37	0	0
1	42	1.28	2	1
1	44	0.71	0	0
0	40	0.51	0	0
0	41	1.41	0	0
1	48	0.71	0	0
1	33	1.66	10	1
1	44	0.56	0	0
1	39	2.3	1	1
1	34	2.72	1	1
1	32	4.18	7	1
0	31	0.83	3	1
1	32	4.05	2	1
1	34	1.29	6	1
0	41	0.39	0	0
0	46	0.4	0	0
0	30	2.89	7	1
1	32	0.38	3	1
1	42	2.1	3	1
1	39	3.27	0	0
0	31	0.82	2	1
1	42	1.59	0	0
1	43	1.45	3	1
1	40	0.37	1	1
1	41	2.77	6	1
1	37	1.58	2	1
1	48	1.35	0	0
1	34	3.45	3	1
1	34	0.44	1	1
1	36	1.74	12	1
1	31	2	2	1
1	33	3.05	5	1
0	42	0.13	0	0
1	42	1.8	1	1
1	40	0.8	1	1
1	30	3.75	4	1
1	42	0.19	0	0
1	39	1.23	5	1
0	39	0.08	0	0
0	36	0.73	0	0
0	30	1.35	6	1
1	44	0.03	0	0
1	35	3.05	0	0
0	36	2.4	2	1
0	42	0.59	0	0
0	32	4.85	4	1
0	40	1.64	0	0
1	44	5.01	0	0
1	48	0.49	0	0
1	36	0.46	7	1
1	41	0.72	2	1
1	33	2.27	3	1
1	39	2.55	11	1
0	32	2.16	6	1
1	46	0.01	0	0
1	34	3.36	7	1
0	38	4.86	10	1
1	36	1.7	3	1
1	41	0.64	0	0
1	47	2.01	3	1
0	38	2.63	8	1
0	45	0.78	0	0
1	43	0.88	1	1
0	45	0.07	0	0
0	38	0.59	4	1
0	41	0.12	0	0
0	40	4.83	8	1
0	43	0.6	0	0
1	39	0.5	0	0
0	44	1.2	0	0
1	34	4.3	4	1
0	42	0.54	2	1
1	35	2.42	1	1
1	31	4.93	7	1
1	33	1.44	4	1
0	38	1.46	0	0
1	35	2.22	10	1
1	48	1.03	1	1
1	33	1.94	6	1
1	37	5.48	5	1
1	34	1.89	6	1
0	38	0.85	8	1
1	38	0.46	0	0
1	37	1.81	6	1
1	33	2.35	15	1
1	41	3.86	16	1
1	40	1.74	0	0
1	33	3.76	2	1
0	30	5.78	10	1
0	30	4.18	4	1
0	34	2.6	6	1
1	42	1.34	3	1
1	30	0.09	0	0
0	34	0.45	3	1
0	34	0.99	1	1
0	38	1.45	1	1
1	40	0.8	7	1
1	39	1.83	1	1
1	30	1.57	5	1
1	43	1.02	3	1
1	36	3.1	9	1
1	32	3.36	1	1
1	36	1.97	3	1
0	38	0.62	0	0
1	32	1.15	4	1
1	36	2.89	9	1
0	45	0.64	0	0
1	41	1.82	4	1
1	41	0.19	2	1
0	46	1.44	0	0
0	40	2.38	1	1
1	36	4.69	6	1
1	47	0.27	0	0
1	39	0.4	0	0
1	45	1	0	0
0	44	0.79	1	1
1	41	1.38	0	0
1	40	0.3	2	1
1	40	1.1	3	1
1	47	0.31	0	0
0	31	2.35	4	1
1	45	0.43	0	0
1	35	2.9	4	1
1	43	1.86	6	1
1	33	1.56	2	1
1	41	1.92	1	1
1	42	2.16	2	1
1	34	2.73	5	1
1	37	3.2	11	1
1	42	1.39	2	1
1	37	5.62	2	1
0	41	2.46	8	1
1	32	1.8	7	1
0	31	0.09	0	0
1	45	1.73	0	0
1	38	0.81	2	1
0	42	1.38	8	1
1	35	3.2	3	1
1	45	1.04	3	1
1	44	0.55	0	0
1	34	2.14	9	1
0	44	0.63	0	0
1	41	0.98	1	1
0	41	0.09	1	1
1	35	1.61	6	1
1	37	2.51	8	1
1	38	0.55	2	1
0	41	2.17	1	1
0	50	0.15	0	0
1	30	5.84	8	1
1	38	4.18	3	1
0	44	0.38	6	1
1	31	2.19	5	1
0	42	0.56	2	1
0	35	0.27	0	0
1	40	0.65	2	1
1	37	0.63	1	1
1	42	0.11	2	1
1	47	0.7	4	1
1	36	0.09	1	1
0	33	1.62	2	1
1	40	2.9	4	1
1	44	0.58	0	0
1	46	0.86	0	0
0	40	2.9	5	1
1	42	3.38	3	1
1	41	0.08	0	0
0	37	3.23	0	0
1	34	0.27	2	1
1	37	4.23	0	0
1	30	3	4	1
1	32	9.33	6	1
1	36	2.21	7	1
1	32	4.66	1	1
1	43	0.64	4	1
1	38	1.26	3	1
1	43	0.08	1	1
0	34	5.66	0	0
1	41	2.41	7	1
0	45	2.85	3	1
1	44	2.06	0	0
1	30	3.65	4	1
0	38	2.18	2	1
1	36	2.31	4	1
0	30	4.3	0	0
1	35	1.1	6	1
0	42	0.54	0	0
1	35	1.16	7	1
1	37	0.39	1	1
1	40	1.2	6	1
0	43	0.82	3	1
1	42	0.95	1	1
1	39	0.68	3	1
1	42	0.82	0	0
1	41	0.87	6	1
1	31	1.31	2	1
1	37	3.94	6	1
0	39	0.15	4	1
1	36	2.56	4	1
0	34	7.02	4	1
1	41	0.08	0	0
1	40	1.49	0	0
1	40	1.66	9	1
1	51	0.15	0	0
1	49	0.11	0	0
0	33	4.26	3	1
1	44	0.76	0	0
1	40	0.75	2	1
1	41	1.84	0	0
1	41	0.67	2	1
1	44	0.31	0	0
1	33	1.01	4	1
1	39	3.86	4	1
1	39	1.24	2	1
0	32	1.7	0	0
0	40	0.35	5	1
0	43	0.41	0	0
1	41	5.24	5	1
1	33	2.32	1	1
1	35	0.7	0	0
1	47	0.15	1	1
1	36	1.72	3	1
1	33	4.28	1	1
1	33	2.74	8	1
1	43	0.49	2	1
1	41	2.9	7	1
1	36	0.95	0	0
1	42	0.85	6	1
1	40	7.14	5	1
1	42	0.85	0	0
1	37	7.43	4	1
1	32	4.65	1	1
1	35	3.75	8	1
0	37	1.68	10	1
1	39	2.16	2	1
1	42	1.36	1	1
1	45	1.51	0	0
1	36	8.25	15	1
1	38	2.84	1	1
1	38	1.27	14	1
0	36	4.53	6	1
1	38	2.21	1	1
1	36	5.02	2	1
1	37	0.71	0	0
1	40	0.75	1	1
1	42	0.45	6	1
1	33	9.47	4	1
1	30	4.98	9	1
1	39	0.12	0	0
1	40	3.47	4	1
1	38	2.21	2	1
0	34	3.67	6	1
1	40	0.48	1	1
1	41	0.21	3	1
0	42	0.73	0	0
1	46	0.14	0	0
1	34	0.55	4	1
1	44	0.1	0	0
0	49	0.61	0	0
1	34	4.47	8	1
1	32	3.28	9	1
0	39	1.74	2	1
1	44	0.1	0	0
1	36	4.89	10	1
1	30	3.55	7	1
0	44	1.15	0	0
1	37	2.45	3	1
0	40	0.12	0	0
1	44	0.9	2	1
1	41	0.16	3	1
1	46	0.19	0	0
0	42	0.03	1	1
1	41	1.27	5	1
1	38	0.01	1	1
1	37	2.12	3	1
1	31	2.64	4	1
1	43	1.27	4	1
1	45	0.27	0	0
1	30	6.89	13	1
1	38	7.54	3	1
0	39	1.46	2	1
1	39	0.77	1	1
1	37	6.08	1	1
1	40	5.72	0	0
1	34	3.99	3	1
1	32	4.3	5	1
1	43	3.91	7	1
1	37	1.33	1	1
1	37	2.8	1	1
0	33	2.08	2	1
1	41	0.53	3	1
1	42	2.27	1	1
1	43	13.3	6	1
0	34	2.65	8	1
1	34	1.26	0	0
1	40	0.05	0	0
0	36	0.48	5	1
1	37	3.87	3	1
1	30	3.95	6	1
0	45	0.35	0	0
1	33	2.52	5	1
0	42	1.35	0	0
0	40	0.75	1	1
1	31	0.85	1	1
1	35	2.55	4	1
1	34	3.42	4	1
1	37	1.68	2	1
1	41	3.93	4	1
0	43	0.61	0	0
0	41	1.1	0	0
1	38	0.83	2	1
1	37	3.96	8	1
1	47	0.2	0	0
1	32	3.39	1	1
0	43	0.98	0	0
0	42	2.26	1	1
1	44	0.46	4	1
1	30	2.68	1	1
1	31	0.91	4	1
1	38	5.33	10	1
0	30	3.97	2	1
1	36	0.88	3	1
0	35	1.14	0	0
1	45	4.12	1	1
1	37	4.36	11	1
1	38	1.45	3	1
1	37	2.61	2	1
1	33	7.7	5	1
1	44	0.08	0	0
1	36	0.9	0	0
1	41	1.36	3	1
1	34	2.29	0	0
1	36	6.86	1	1
1	38	2.56	1	1
1	44	0.71	3	1
1	36	4.57	6	1
0	40	0.29	1	1
1	34	2.37	3	1
0	36	0.03	0	0
0	41	0.1	1	1
1	44	0.98	1	1
1	40	0.36	1	1
1	38	1.34	3	1
1	32	6.26	1	1
1	39	1.24	3	1
1	46	0.35	0	0
0	41	2.24	1	1
1	39	1.82	9	1
0	30	3.66	3	1
0	42	0.26	2	1
0	33	4.74	7	1
0	46	1.58	0	0
0	34	3.9	6	1
1	38	4.21	8	1
1	44	0.48	2	1
0	32	3.15	3	1
0	40	1.11	0	0
1	32	1.65	5	1
1	38	0.99	0	0
0	38	0.42	1	1
1	35	12.8	4	1
0	30	1.85	2	1
1	38	0.1	0	0
1	48	1.59	2	1
0	36	3.41	5	1
1	44	4.4	1	1
1	43	0.99	2	1
0	36	2.73	2	1
1	37	2.3	3	1
0	35	0.89	6	1
1	37	1.01	1	1
1	41	2.85	4	1
0	37	2.17	2	1
0	47	1.22	0	0
1	39	0.44	1	1
1	43	1.74	3	1
0	35	6.93	6	1
1	30	2.94	3	1
1	39	1.28	1	1
0	42	0.27	0	0
1	41	0.16	0	0
1	44	0.03	0	0
1	36	1.67	2	1
0	33	3.86	5	1
1	32	1.73	3	1
0	31	1.7	2	1
1	44	1.1	7	1
1	32	0.75	0	0
1	42	0.27	0	0
0	31	4.68	2	1
1	31	2.49	2	1
1	33	8.55	2	1
1	40	3.26	1	1
0	35	0.68	4	1
1	38	0.05	0	0
1	38	1.58	0	0
0	41	0.31	0	0
0	30	0.98	3	1
1	44	2.11	3	1
0	42	0.99	0	0
1	34	1.32	5	1
1	39	2.19	2	1
0	37	1.68	0	0
1	36	1.17	4	1
1	43	1.32	1	1
1	38	0.49	0	0
0	32	4.67	0	0
1	33	0.14	0	0
0	35	1.59	0	0
1	43	0.78	0	0
1	50	1	0	0
1	47	1.74	0	0
1	35	3.6	0	0
1	38	1.61	6	1
0	40	5.88	0	0
0	46	0.96	1	1
1	33	4.66	8	1
0	32	2.44	0	0
0	31	2.96	4	1
1	31	2.26	6	1
1	42	0.4	0	0
0	35	4.24	4	1
0	41	0.24	0	0
1	37	7.57	0	0
1	36	10.27	0	0
0	31	8.39	0	0
0	30	4.47	0	0
1	45	5.51	6	1
1	41	0.8	1	1
1	37	0.08	0	0
0	38	5.62	4	1
1	30	1.69	0	0
1	39	0.61	1	1
0	40	0.52	0	0
0	49	0.07	0	0
0	43	1.36	0	0
1	45	2.12	1	1
1	33	3.12	3	1
1	47	0.12	0	0
1	36	2.01	1	1
1	36	2.23	0	0
1	40	1.86	0	0
1	35	2.93	8	1
1	34	8.44	1	1
1	31	3.75	2	1
1	39	1.71	0	0
1	43	0.9	3	1
1	40	2.47	4	1
1	41	1.04	0	0
0	40	2.5	6	1
0	31	3.03	4	1
1	40	3.12	0	0
0	36	2.42	0	0
1	38	3.27	8	1
1	39	3.87	2	1
1	38	1.74	5	1
0	39	2.02	1	1
1	36	2.81	0	0
1	41	1.6	1	1
1	43	0.78	0	0
1	36	3.84	4	1
1	35	0.04	0	0
0	43	1.14	0	0
0	36	3.18	0	0
1	34	1.13	4	1
1	38	0.07	0	0
Notes: AMH:Anti-Mullerian hormone
Supplementary Table 2
Data for the comparison of blastocyst obtained rates between the two groups with or without DE-T1 supplementation
